# Supplementary material
Source: PubMed Central journal article supplement (PMC4288174)
Supplement: supp_gku1279_Iyama_et_al_SI_Complete_NAR_Rev2.pdf [file supp_gku1279_Iyama_et_al_SI_Complete_NAR_Rev2.pdf]

## **Supplementary Information**

CSB Interacts with SNM1A and Promotes DNA Interstrand Crosslink Processing

Teruaki Iyama, Sook Y. Lee, Brian R. Berquist, Opher Gileadi, Vilhelm A. Bohr, Michael M. Seidman, Peter J. McHugh, David M. Wilson III

**Table S1. Synthetic Oligonucleotides.** Oligonucleotide name and nucleotide sequence are designated. P = phosphate; B = biotin.

| Oligonucleotide name | Nucleotide sequence                                                      |
|----------------------|--------------------------------------------------------------------------|
| linker Fw1           | 5'-CCGGAGGTGGAGGCGGTTCAAGCGGAGGTGGCTCTGGCGGTGGCGGATCGC-3'                |
| linker Rv1           | 5'-GATCGCGATCCGCCACCGCCAGAGCCACCTCCGCCTGAACCGCCTCCACCT-3'                |
| linker Fw2           | 5'-CCGGAGGTGGAGGCGGTTCAAGCGGAGGTGGCTCTGGCGGTGGCGGATCG-3'                 |
| linker Rv2           | 5'-GATCCGATCCGCCACCGCCAGAGCCACCTCCGCCTGAACCGCCTCCACCT-3'                 |
| CSB XhoI-Fw          | 5'-AGTCCTCGAGGAATGCCAAATGAGGGAATC-3'                                     |
| CSB BamHI-Rv         | 5'-AAGCAAGGATCCTTAGCAGTATTCTGGCTTGAG-3'                                  |
| SNM1A XhoI-Fw        | 5'-ATCTCGAGACCATGTTAGAAGACATTTCCG-3'                                     |
| SNM1A BamHI-Rv       | 5'-GGAGGATCCATCAATATCCAGCTTC-3'                                          |
| 5'-60mer             | 5'-P-TTATAAATAAAATATTTAAACCAATTTGATCATCTATTATATATTTATTAATTTATTTTT-3'     |
| 5'-20mer             | 5'-P-ATAATTTGATCATCTATTAT-3'                                             |
| 5'-Biotin-21mer      | 5'-B-TATAATAGATGATCAAATTAT-P-3'                                          |
| 5'-Biotin-61mer      | 5'-B-TAAAAATAAATTAATAAATATATAATAGATGATCAAATTGGTTTTAATATTTTATTATATAA-P-3' |
| Fluorescent-20mer    | 5'-P-A[FluoresceinT]AATTTGA[BHQ1-T]CATCTATTAT-3'                         |
| 5'-Biotin-20mer      | 5'-B-ATAATAGATGATCAAATTAT-3'                                             |
| dtCSB BamHI-Fw       | 5'-ATCGGATCCACCATGGCCTACCCATACGATGTTCCAGATTACGCTAGCCCAAATGAGGGA-3'       |
| dtCSB XhoI-Rv        | 5'-CTGCTCGAGTTAGTGATGGTGATGGTGGTGACGACCTTCGATGCAGTATTCTGGCTTGAG-3'       |

**Table S2. Summary of the yeast two-hybrid hits using CSB as bait.** The 59 independent clones first isolated are listed, including gene name (if known) and NCBI accession number. The qualitative results of the  $\beta$ -galactosidase (LacZ) assay and growth on minimal medium lacking histidine and adenine (SD-ade, stringent selection) are summarized (see Figure S1). Based on these data, an overall rating of interaction strength is noted. N/A = not applicable.

| Clone No. | Homo Sapiens, Gene Name                                                                           | Accession No. (NCBI) | LacZ Positive | Growth on SD-ade | Interaction Strength |
|-----------|---------------------------------------------------------------------------------------------------|----------------------|---------------|------------------|----------------------|
| 1         | NODAL modulator 1 (NOMO1), mRNA                                                                   | NM_014287.3          | ++            | -                | intermediate         |
| 2         | Chromosome 8 genomic contig, GRCh37.p13 Primary Assembly                                          | NT_167187.1          | +             | -                | weak                 |
| 3         | Latent transforming growth factor beta binding protein 1 (LTBP1), transcript variant 2, mRNA      | NM_000627.3          | +             | -                | weak                 |
| 4         | Ankyrin repeat domain 7 (ANKRD7), mRNA                                                            | NM_019644.3          | -             | -                | weak                 |
| 5         | DnaJ (Hsp40) homolog, subfamily C, member 13 (DNAJC13), mRNA                                      | NM_015268.3          | -             | -                | weak                 |
| 6         | Chromosome 19 genomic contig, GRCh37.p13 Primary Assembly                                         | NT_011295.11         | ++            | +                | strong               |
| 7         | HECT domain containing E3 ubiquitin protein ligase 4 (HECTD4), mRNA                               | NM_001109662.3       | +             | -                | weak                 |
| 8         | Unknown sequence                                                                                  | N/A                  | ++            | -                | intermediate         |
| 9         | SHQ1, H/ACA ribonucleoprotein assembly factor (SHQ1), mRNA                                        | NM_018130.2          | -             | -                | weak                 |
| 10        | PDZ and LIM domain 1 (PDLIM1), mRNA                                                               | NM_020992.3          | +             | -                | weak                 |
| 11        | Chromosome 20 genomic scaffold, alternate assembly CHM1_1.1                                       | NW_004929418.1       | +             | -                | weak                 |
| 12        | Solute carrier family 27 (fatty acid transporter), member 2 (SLC27A2), transcript variant 1, mRNA | NM_003645.3          | +             | -                | weak                 |
| 13        | Zinc finger, MYND-type containing 12 (ZMYND12), transcript variant 1, mRNA                        | NM_032257.4          | -             | -                | weak                 |
| 14        | Tryptophan rich basic protein (WRB), transcript variant 1, mRNA                                   | NM_004627.4          | +             | -                | weak                 |
| 15        | Ornithine decarboxylase 1 (ODC1), mRNA                                                            | NM_002539.1          | +             | (+)              | weak                 |
| 16        | HECT domain containing E3 ubiquitin protein ligase 4 (HECTD4), mRNA                               | NM_001109662.3       | +             | -                | weak                 |

|    |                                                                                              |                |     |     |              |
|----|----------------------------------------------------------------------------------------------|----------------|-----|-----|--------------|
| 17 | Serum/glucocorticoid regulated kinase 1 (SGK1), transcript variant 1, mRNA                   | NM_005627.3    | +   | -   | weak         |
| 18 | Hydroxysteroid (17-beta) dehydrogenase 11 (HSD17B11), mRNA                                   | NM_016245.3    | +   | -   | weak         |
| 19 | Ribosomal protein L26-like 1 (RPL26L1), mRNA                                                 | NM_016093.2    | -   | -   | weak         |
| 20 | Unknown sequence                                                                             | N/A            | ++  | -   | intermediate |
| 21 | DEAD (Asp-Glu-Ala-Asp) box helicase 5 (DDX5), mRNA                                           | NM_004396.3    | +   | -   | weak         |
| 22 | TAF7 RNA polymerase II, TATA box binding protein (TBP)-associated factor, 55kDa (TAF7), mRNA | NM_005642.2    | +   | -   | weak         |
| 23 | Chromosome 15 genomic contig, GRCh37.p13 Primary Assembly                                    | NT_010274.17   | +   | -   | weak         |
| 24 | FK506 binding protein 5 (FKBP5), transcript variant 1, mRNA                                  | NM_004117.3    | +   | -   | weak         |
| 25 | Zinc finger, AN1-type domain 5 (ZFAND5), transcript variant a, mRNA                          | NM_001102420.2 | +   | -   | weak         |
| 26 | 3-hydroxyisobutyryl-CoA hydrolase (HIBCH), transcript variant 1, mRNA                        | NM_014362.3    | ++  | -   | intermediate |
| 27 | Zinc finger protein 236 (ZNF236), mRNA                                                       | NM_007345.3    | +   | -   | weak         |
| 28 | Deoxynucleotidyltransferase, terminal, interacting protein 2 (DNTTIP2), mRNA                 | XR_246259.1    | +++ | ++  | strong       |
| 29 | Glutathione S-transferase pi 1 (GSTP1), mRNA                                                 | NM_000852.3    | +   | -   | weak         |
| 30 | Signal recognition particle 9kDa (SRP9), transcript variant 1, mRNA                          | NM_001130440.1 | ++  | -   | intermediate |
| 31 | Mitochondrial ribosomal protein L51 (MRPL51), mRNA                                           | NM_016497.3    | +   | -   | weak         |
| 32 | Family with sequence similarity 49, member B (FAM49B), transcript variant 1, mRNA            | NM_001256763.1 | +   | -   | weak         |
| 33 | Chromosome 20 genomic contig, GRCh37.p13 Primary Assembly                                    | NT_011362.10   | ++  | -   | intermediate |
| 34 | Chromosome 15 genomic contig, GRCh37.p13 Primary Assembly                                    | NT_010274.17   | -   | -   | weak         |
| 35 | HIV-1 Tat specific factor 1 (HTATSF1), transcript variant 1, mRNA                            | NM_001163280.1 | ++  | -   | intermediate |
| 36 | Inositol 1,4,5-trisphosphate receptor, type 2 (ITPR2), mRNA                                  | NM_002223.2    | -   | (+) | weak         |
| 37 | Kruppel-like factor 3 (basic) (KLF3), mRNA                                                   | NM_016531.5    | +   | -   | weak         |

|    |                                                                                      |                |     |     |              |
|----|--------------------------------------------------------------------------------------|----------------|-----|-----|--------------|
| 38 | Chromosome 9 genomic contig, GRCh37.p13 Primary Assembly                             | NT_008413.18   | +   | -   | weak         |
| 39 | Host cell factor C2 (HCFC2), mRNA                                                    | NM_013320.2    | +   | -   | weak         |
| 40 | Membrane-spanning 4-domains, subfamily A, member 6E (MS4A6E), mRNA                   | NM_152851.2    | +   | -   | weak         |
| 41 | Chromosome 19 genomic contig, GRCh37.p13 Primary Assembly                            | NT_011295.11   | ++  | -   | intermediate |
| 42 | Fas cell surface death receptor (FAS), transcript variant 1, mRNA                    | NM_000043.4    | ++  | -   | intermediate |
| 43 | Mitochondrial ribosomal protein L3 (MRPL3), mRNA                                     | NM_007208.3    | ++  | -   | intermediate |
| 44 | DNA cross-link repair 1A (DCLRE1A), transcript variant 1, mRNA                       | NM_001271816.1 | +++ | +++ | strong       |
| 45 | Chromosome 15 genomic contig, GRCh37.p13 Primary Assembly                            | NT_010194.17   | ++  | -   | intermediate |
| 46 | NODAL modulator 1 (NOMO1), mRNA                                                      | NM_014287.3    | +   | -   | weak         |
| 47 | Vesicle-associated membrane protein 8 (VAMP8), mRNA                                  | NM_003761.4    | ++  | -   | intermediate |
| 48 | Chromosome 9 genomic contig, GRCh37.p13 Primary Assembly                             | NT_008413.18   | -   | -   | weak         |
| 49 | Saccharopine dehydrogenase (putative) (SCCPDH), mRNA                                 | NM_016002.2    | +   | -   | weak         |
| 50 | SEC23 interacting protein (SEC23IP), transcript variant 1, mRNA                      | NM_007190.3    | +   | -   | weak         |
| 51 | Chromosome 7 genomic contig, GRCh37.p13 Primary Assembly                             | NT_007933.15   | +   | -   | weak         |
| 52 | CD93 molecule (CD93), mRNA                                                           | NM_012072.3    | -   | -   | weak         |
| 53 | Chromosome 3 genomic contig, GRCh37.p13 Primary Assembly                             | NT_005612.16   | -   | -   | weak         |
| 54 | Zinc finger protein 227 (ZNF227), mRNA                                               | NM_182490.1    | +   | -   | weak         |
| 55 | Chromosome 3 genomic contig, GRCh37.p13 Primary Assembly                             | NT_005612.16   | -   | -   | weak         |
| 56 | Leo1, Paf1/RNA polymerase II complex component, homolog (S. cerevisiae) (LEO1), mRNA | NM_138792.2    | +++ | ++  | strong       |
| 57 | Chromosome 4 genomic contig, GRCh37.p13 Primary Assembly                             | NT_016354.19   | -   | -   | weak         |
| 58 | Family with sequence similarity 76, member A (FAM76A), transcript variant 1, mRNA    | NM_001143912.1 | -   | -   | weak         |
| 59 | Charged multivesicular body protein 5 (CHMP5), transcript variant 1, mRNA            | NM_016410.5    | +++ | +++ | strong       |

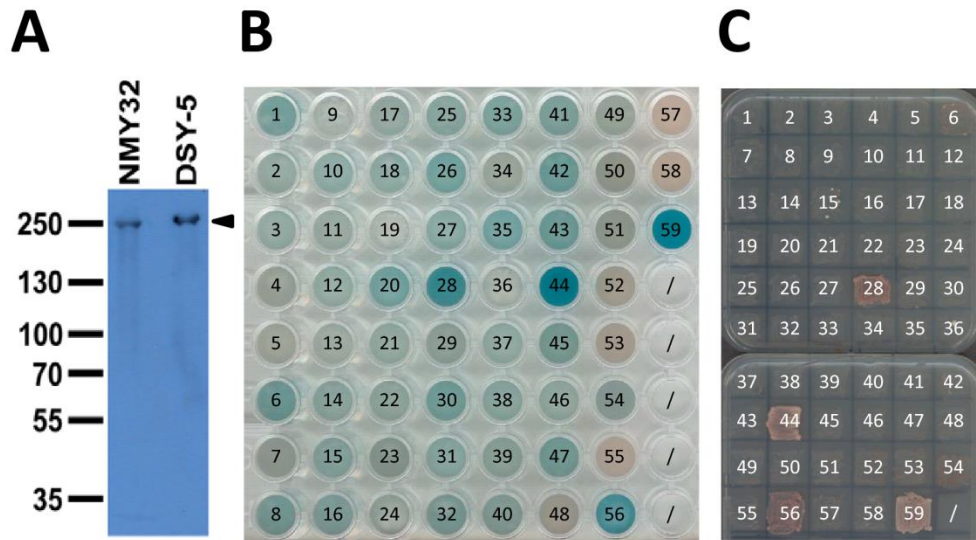

**Figure S1. Summary of the yeast two hybrid screen.** The bait construct was made by subcloning the *CSB* cDNA into the vector pLexA-DIR. Following transformation of the bait construct using standard procedures, correct expression of the bait fusion protein was verified by western blotting of cell extracts (from the two yeast strains indicated) with a mouse monoclonal antibody directed against the LexA DNA binding domain (panel A). The absence of self-activation was verified by co-transformation of the bait plasmid with a control prey and demonstration of the lack of histidine/adenine prototrophy and  $\beta$ -galactosidase activity. For the yeast two-hybrid screen, the bait was co-transformed together with a normalized human universal cDNA library into the strain NMY32 (MATa his3 $\Delta$ 200 trp1-901 leu2-3,112 (lexAop)8-ADE2 LYS2::(lexAop)4-HIS3 URA3::(lexAop)8-lacZ GAL4). A total of  $2.5 \times 10^6$  transformants were screened, yielding 59 transformants that grew on minimal medium lacking the amino acids tryptophan, leucine and histidine (selective medium). Library plasmids were isolated from positive clones, and the identity of positive interactors was determined by sequencing (summarized in Table S2). Positive transformants were then tested for  $\beta$ -galactosidase activity using a P<sub>XG</sub>  $\beta$ -galactosidase assay. Forty-six of the 59 initial positives showed  $\beta$ -galactosidase activity and were considered real positives (panel B). As a means of evaluating the strength of the interactions, growth was determined in the absence of both histidine and adenine following plasmid co-transformation; seven of the total interactors were shown to yield a positive result under these more stringent conditions (panel C). See Table S2 for complete summary.

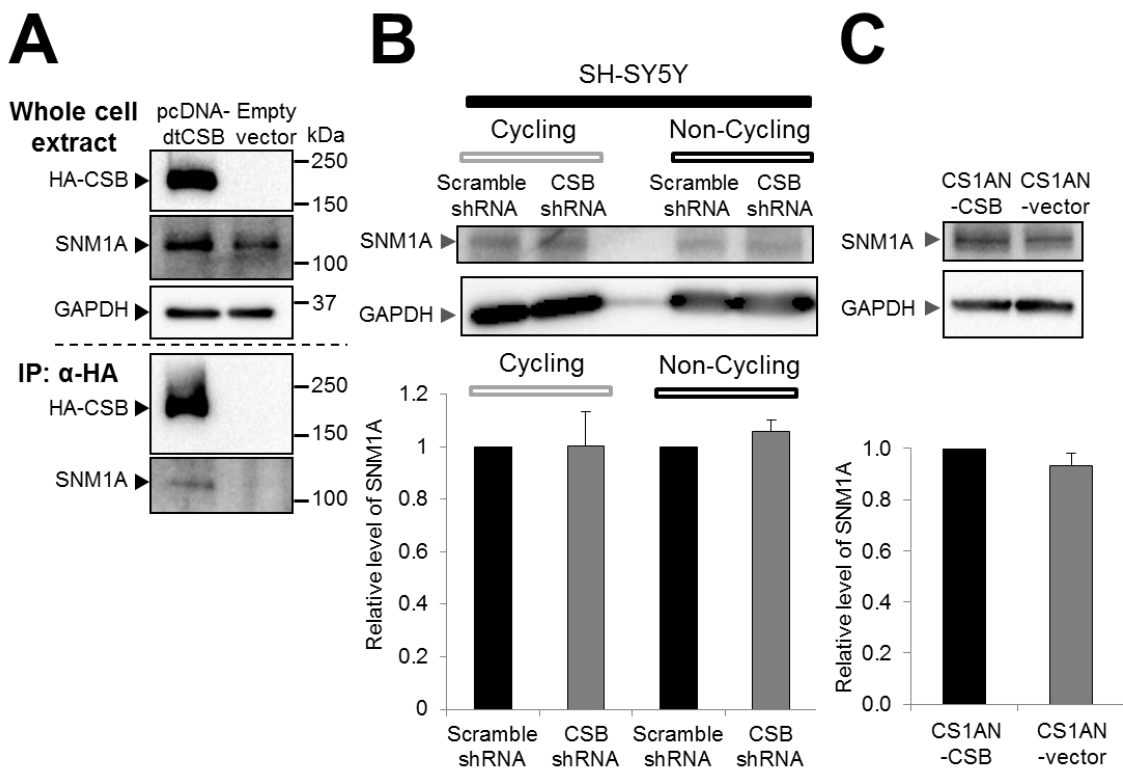

**Figure S2. SNM1A protein co-purifies with CSB from human whole cell extracts, but its steady-state level is not affected by CSB deficiency.** (A) Co-immunoprecipitation of double tagged-CSB (dtCSB) and SNM1A. The pcDNA-dtCSB expression vector, which produces a N-terminal HA-tagged and C-terminal His-tagged protein, was created by amplifying the *CSB* coding region using primers dtCSB BamHI-Fw and dtCSB XhoI-Rv (Table S1), and subcloning the digested product into the BamHI and XhoI restriction sites of pcDNA3.1(+) (Life Technologies). Approximately 24 hr after transfection of either the pcDNA-dtCSB or the pcDNA empty vector into HeLa cells, whole cell extracts were prepared as described in Materials and Methods. Prior to  $\alpha$ -HA immunoprecipitation, the soluble whole cell extract was pre-treated with protein A/G magnetic beads at 4°C for 2 hr to remove nonspecific protein binders. Proteins were subsequently captured using  $\alpha$ -HA magnetic beads at 4°C for 2 hr. The bead-bound material was washed five times, suspended in 2 x SDS-polyacrylamide gel electrophoresis loading dye, and incubated at 95°C for 5 min. Proteins were resolved on a polyacrylamide gel and detected by western blotting. The positions of the dtCSB, SNM1A and GAPDH proteins are shown, as are the protein standards in kDa. Expression of SNM1A protein in (B) cycling and non-cycling scramble shRNA or CSB shRNA SH-SY5Y cells or in (C) CS1AN-CSB or CS1AN-vector cells. SNM1A protein level was determined in whole cell extracts by western blotting, in comparison to GAPDH. The relative level of SNM1A to GAPDH is shown (average and standard deviation of three independent experiments), with the scramble control cell line or CS1AN-CSB being set as 1.

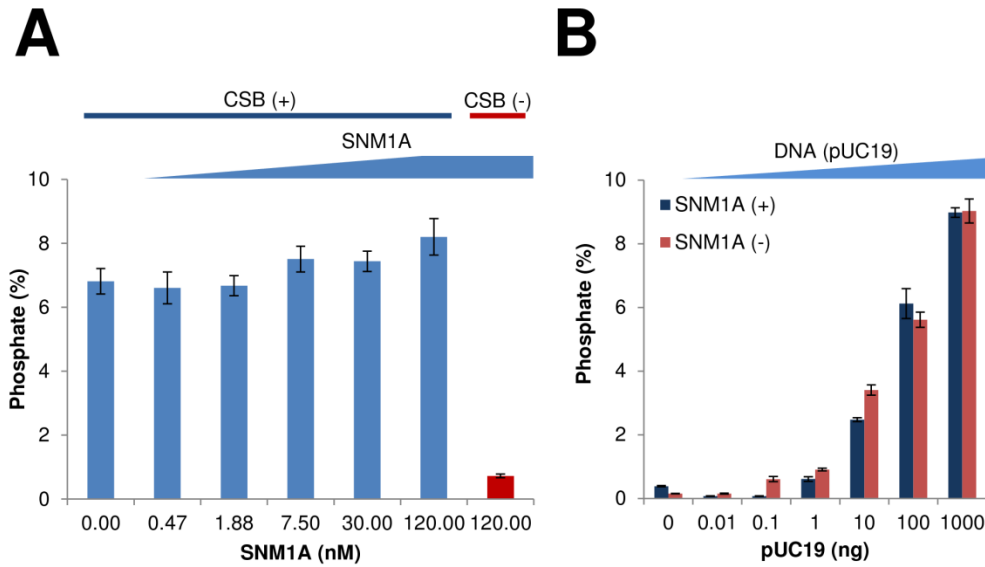

**Figure S3. SNM1A does not affect the DNA-dependent ATPase activity of CSB.** (A) ATP hydrolysis by CSB with the indicated amount of  $\Delta$ N-SNM1A. ATPase reactions (10  $\mu$ L) consisted of 20 mM HEPES pH 8.0, 4 mM  $MgCl_2$ , 2 mM ATP, 40  $\mu$ g/mL BSA, 1 mM DTT, 300 ng pUC19, 50 ng ( $\sim$ 30 nM) CSB and the indicated amount of  $\Delta$ N-SNM1A (0-120 nM). Each reaction was performed for 1 hr at 30°C, and stopped by the addition of 5  $\mu$ L of 0.5 M EDTA. CSB ATPase activity was measured using an inorganic phosphate (Pi) release assay with the Biomol Green phosphate assay reagent (Enzo Life Sciences, Loerrach, Germany). The percentage of free phosphate released from ATP was quantified by the addition of the Biomol Green reagent and reading of the absorbance at 620 nm after a 30 min incubation at 25°C. (B) ATP hydrolysis by CSB with indicated amount of DNA substrate. ATPase activity with various amounts of pUC19 was determined as above in the presence of 15 ng ( $\sim$ 30 nM)  $\Delta$ N-SNM1A. Each data point represents mean  $\pm$  SD from triplicate experiments.



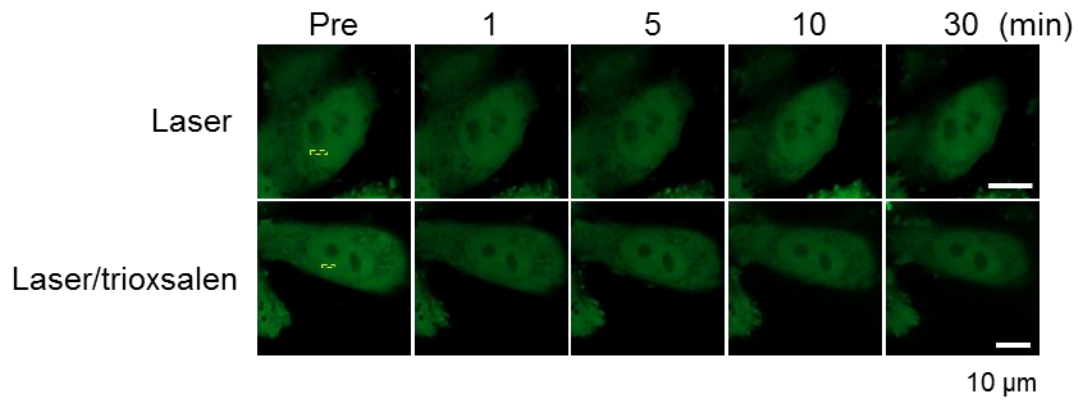

**Figure S4. GFP alone does not respond to localized DNA damage.** HeLa cells were transfected with control vector (pGFP), and after a 20-24 hr incubation, the cells were exposed (or not) to 6  $\mu$ M trioxsalen for 30 min prior to targeted microirradiation (area designated by yellow box). Representative images of GFP at 0, 1, 5, 10 and 30 min after targeted laser irradiation are shown. Bar; 10  $\mu$ m.

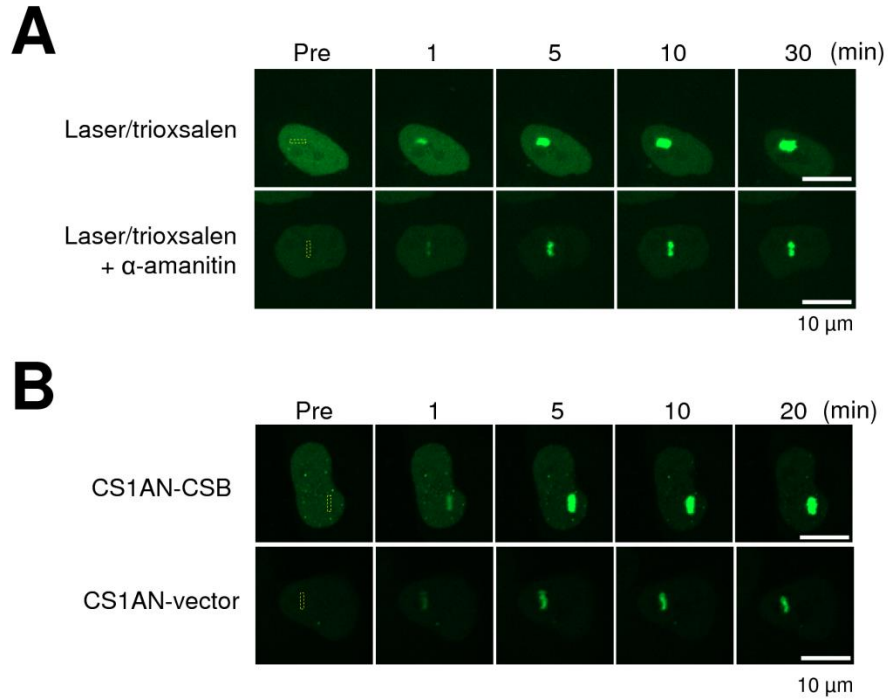

**Figure S5. Representative images of SNM1A recruitment to site-specific ICL damage.** (A) HeLa cells were transfected with pSNM1A-GFP, and after a 20-24 hr incubation, the cells were exposed to 6  $\mu$ M trioxsalen for 30 min prior to targeted microirradiation (area designated by yellow box). Transfected cells were simultaneously treated with 20  $\mu$ M  $\alpha$ -amanitin during the 30 min incubation where indicated. Representative images show SNM1A-GFP accumulation at 0, 1, 5, 10 and 30 min after targeted laser irradiation. (B) CS1AN fibroblasts complemented with either the control vector (CS1AN-vector) or a CSB-expression plasmid (CS1AN-CSB) were transfected with pSNM1A-GFP and incubated with 6  $\mu$ M trioxsalen for 30 min prior to targeted microirradiation as above (area designated by yellow box). Representative images show SNM1A-GFP accumulation at 0, 1, 5, 10 and 20 min after targeted laser irradiation. Bar; 10  $\mu$ m.

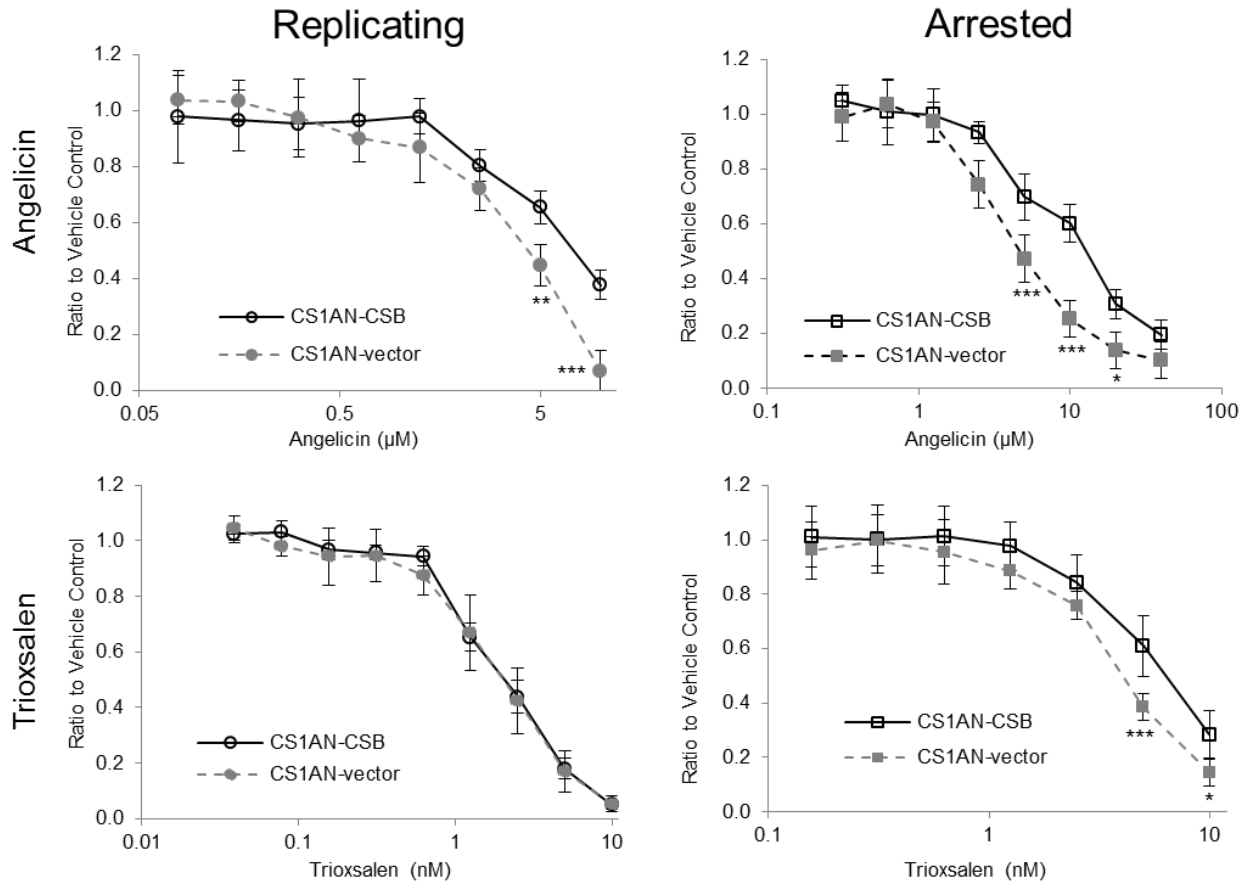

**Figure S6. Sensitivity to angelicin and trioxsalen of replicating and arrested CS1AN mutant and complemented cells.** Viability of replicating or serum starvation-arrested CS1AN-vector and CS1AN-CSB cells treated with either UVA/angelicin (replicating cells, 0.08-10 μM; arrested cells, 0.3-40 μM) or UVA/trioxsalen (replicating cells, 0.04-10 nM; arrested cells, 0.15-10 nM). Viability was measured using a WST-8 assay 72 hr after treatment. Results are presented as the ratio of the value obtained at the indicated concentration of angelicin or trioxsalen relative to that of the untreated (UVA only) cells. The data represent the mean ± SD from three independent experiments. The statistical analysis of each graph was performed by two way ANOVA followed by the Bonferroni post-hoc test (\* $p < 0.05$ , \*\* $p < 0.005$ , \*\*\* $p < 0.0001$ ).

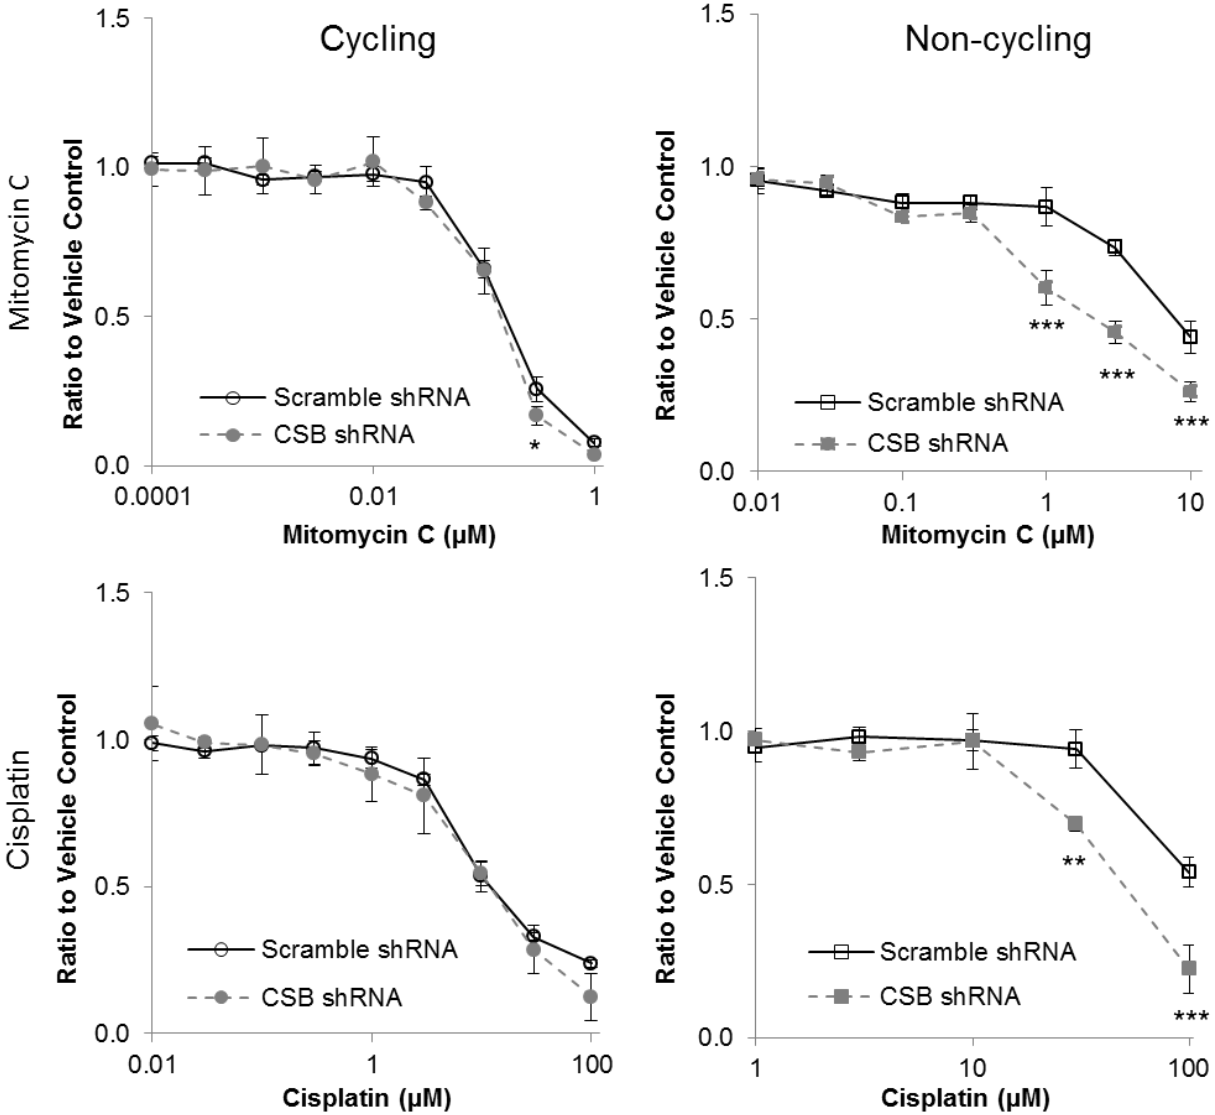

**Figure S7. Sensitivity of cycling and non-cycling scramble shRNA and CSB shRNA SH-SY5Y cells to MMC and cisplatin.** Viability of cycling and non-cycling scramble shRNA and CSB shRNA SH-SY5Y cells treated with MMC (cycling cells; 0.0001-1  $\mu\text{M}$  , non-cycling cells; 0.01-10  $\mu\text{M}$ ) or cisplatin (cycling cells; 0.01-100  $\mu\text{M}$  , non-cycling cells; 1-100  $\mu\text{M}$ ). Viability was measured using a WST-8 assay at 72 hr after treatment. Results are presented as the ratio of the value obtained at the indicated concentration of MMC or cisplatin relative to that of the untreated cells. The data in each graph represent the mean  $\pm$  SD from three independent experiments. Statistical analysis was performed by two-way ANOVA followed by the Bonferroni post-hoc test (\* $p < 0.05$ , \*\* $p < 0.001$ , \*\*\* $p < 0.0001$ ).

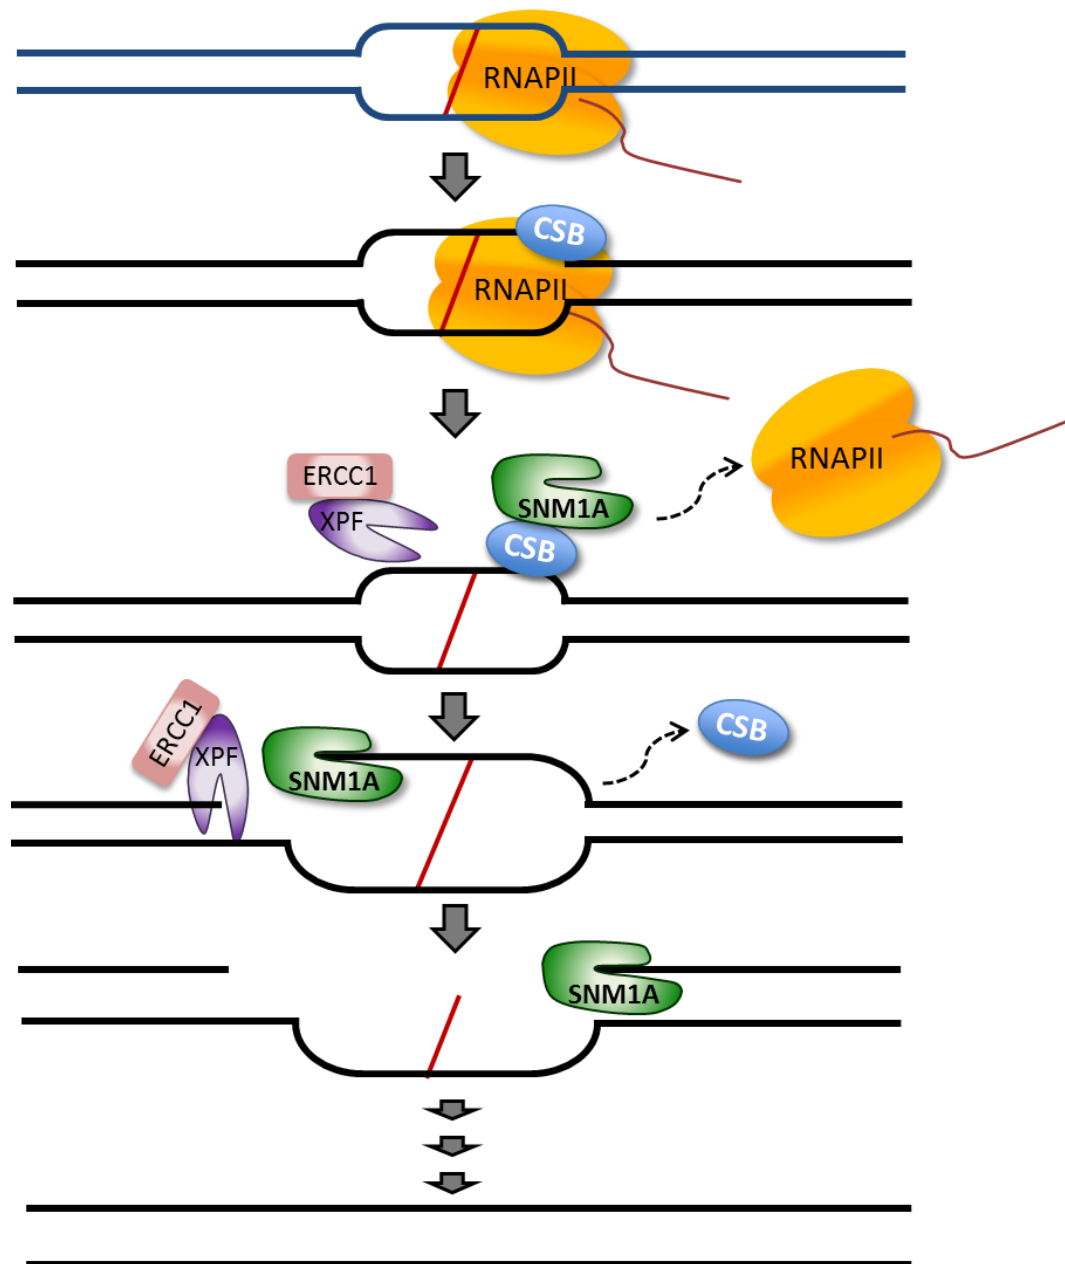

**Figure S8. Proposed model for transcription-associated ICL repair involving CSB and SNM1A.** Once RNAP II encounters a DNA ICL, a response is initiated to recruit various transcription-associated repair factors, such as CSB. CSB reorganizes RNAP II at the site of the lesion and facilitates assembly of repair nucleases, such as SNM1A. ERCC1/XPF participates in ICL removal by incising 5' of the damage. This nick serves as a substrate for the 5' to 3' exonuclease activity of SNM1A, which unhooks the ICL by degrading past the covalent linkage. The gap is filled by a translesion DNA polymerase and sealed by a ligase, prior to a second round of repair, likely classic nucleotide excision repair, to remove the crosslink remnant.
